# Supplementary material
Source: PubMed Central journal article supplement (PMC3833835)

# Supplementary Figure 1

**A**

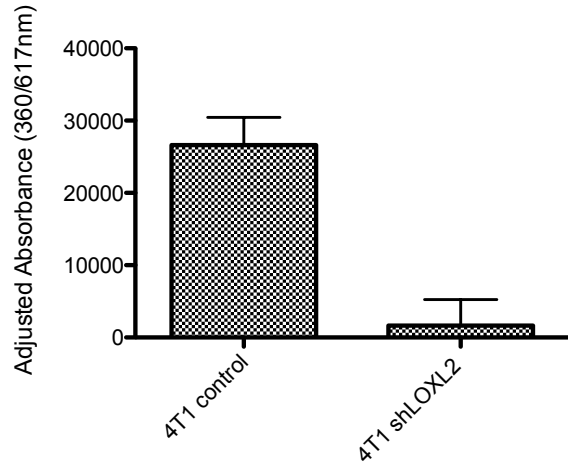

**B**

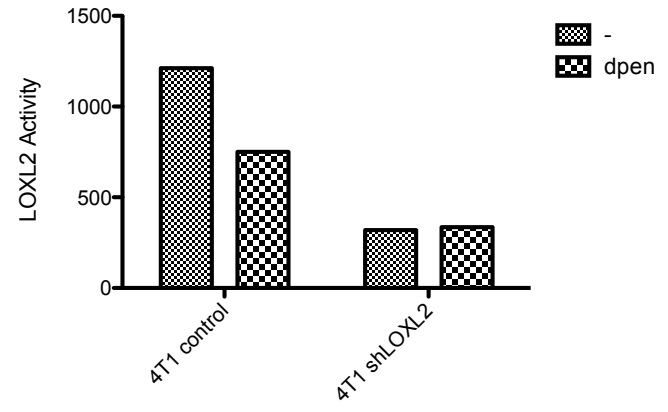

**C**

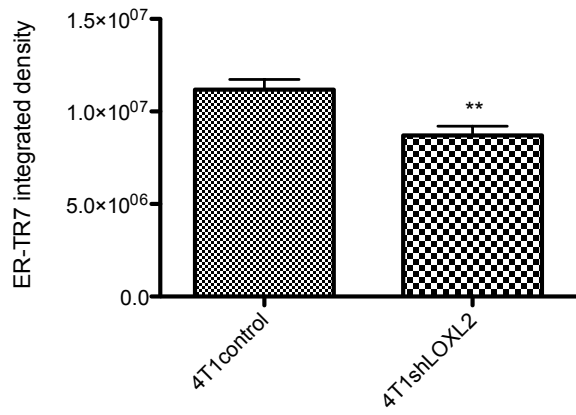

Supplement: NIHMS54694-supplement-2.pdf [file NIHMS54694-supplement-2.pdf]

## Supplementary Figure 2

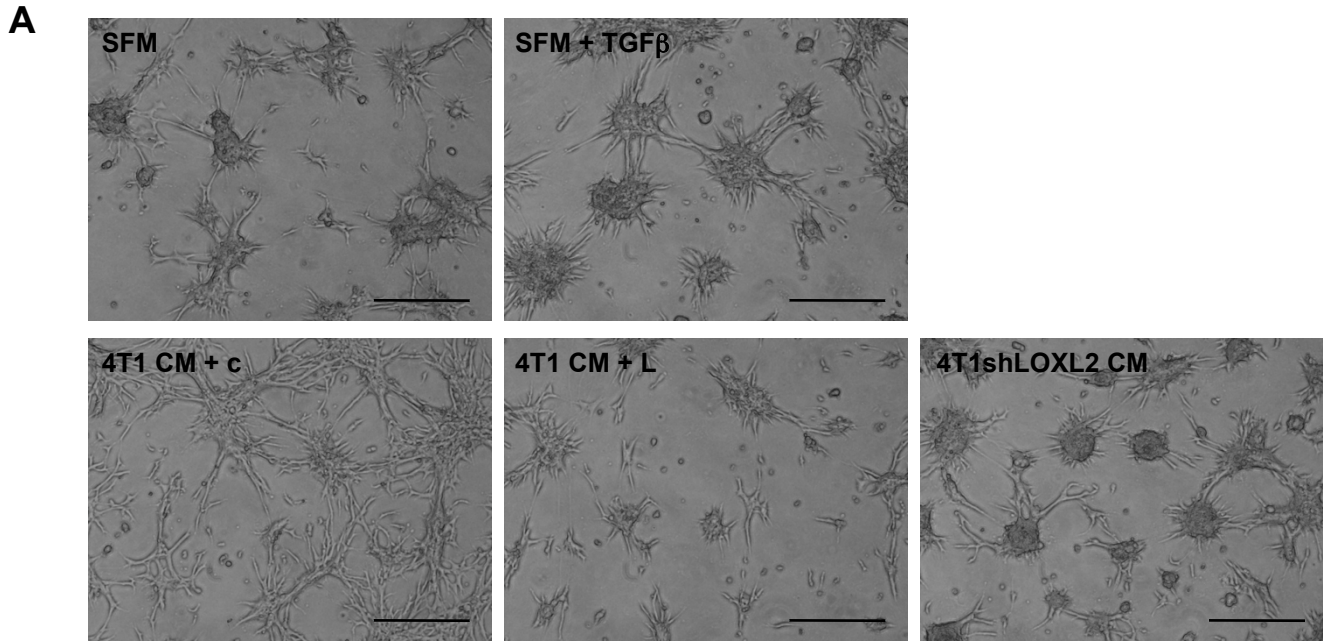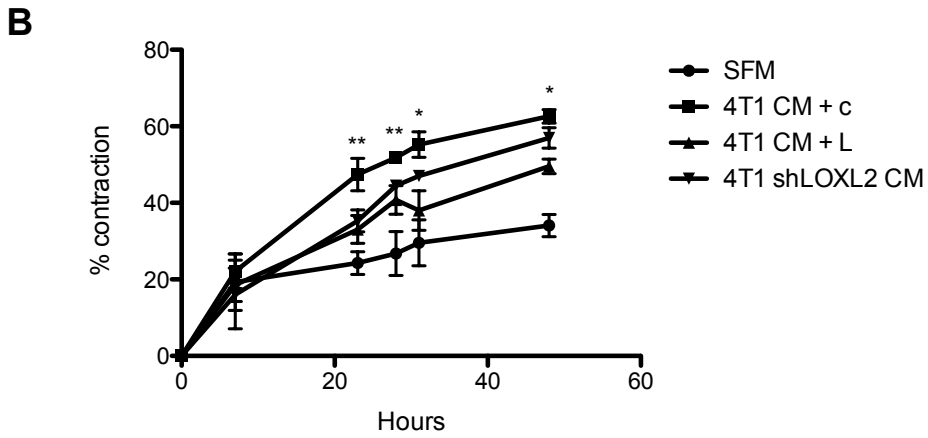

Supplement: NIHMS54694-supplement-3.pdf [file NIHMS54694-supplement-3.pdf]

## Supplementary Figure 3

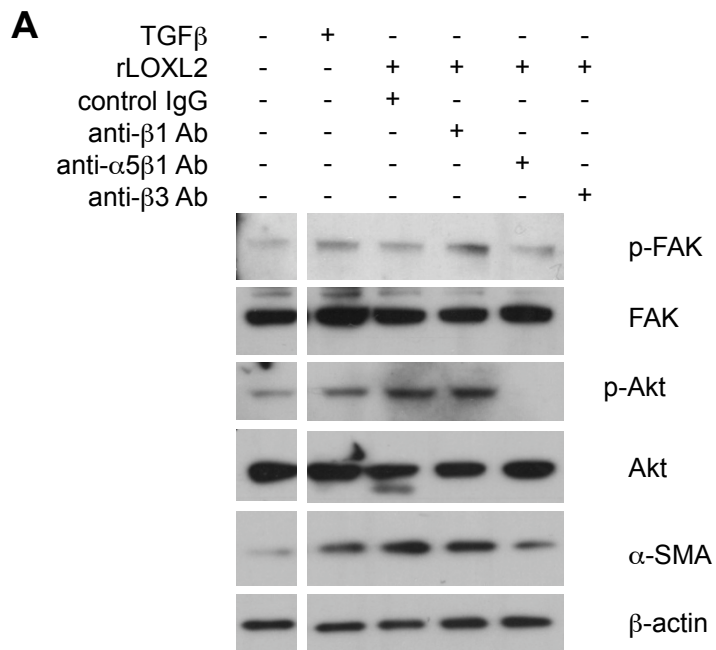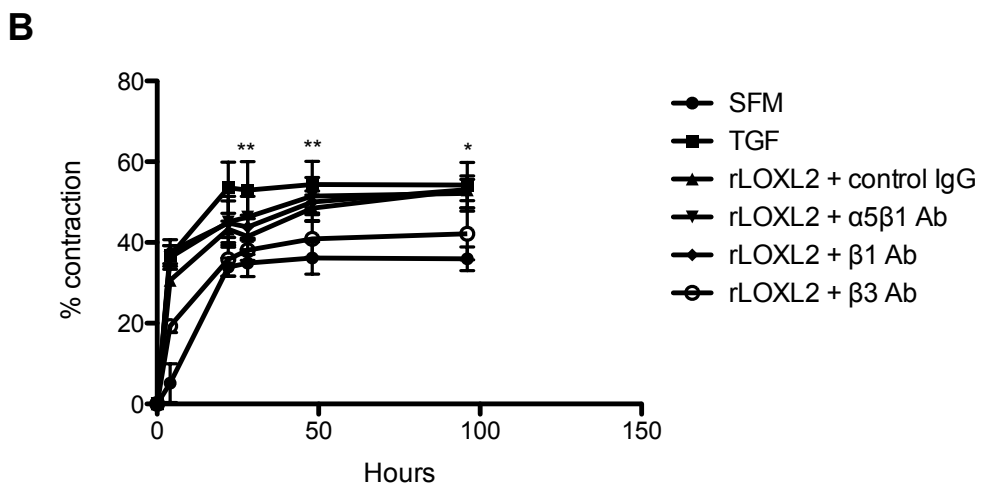

Supplement: NIHMS54694-supplement-4.pdf [file NIHMS54694-supplement-4.pdf]
